# Supplementary material for: Attitudes Toward Artificial Intelligence Within Dermatopathology: An International Online Survey
Source: PubMed Central journal article supplement (PMC7606983; doi:10.3389/fmed.2020.591952), 2020-10-20
Supplement: Data_Sheet_3.pdf [file Data_Sheet_3.pdf]

**Supplementary Table 1**

| Question                                                                                                                  | Yes                         | Proportion answering Yes to the question    |                  |                    | Proportion answering Yes to the question    |                                    |                    | Proportion answering Yes to the question    |                                           |                    |
|---------------------------------------------------------------------------------------------------------------------------|-----------------------------|---------------------------------------------|------------------|--------------------|---------------------------------------------|------------------------------------|--------------------|---------------------------------------------|-------------------------------------------|--------------------|
|                                                                                                                           |                             | Access to WSI                               | No access to WSI | P-value            | Previous use of AI in pathology             | No previous use of AI in pathology | P-value            | Previous use of AI in dermatopathology      | No previous use of AI in dermatopathology | P-value            |
| AI is a topic that has become of interest for the pathology community. Were you already aware of this topic in pathology? | 585 (81.5%)                 | 87.1%                                       | 77.7%            | <b>0.001</b>       | 93.1%                                       | 78.1%                              | <b>&lt; 0.0001</b> | 91.1%                                       | 80.3%                                     | <b>0.020</b>       |
| Have you read any medical publications regarding AI within dermatopathology?                                              | 181 (25.2%)                 | 34.3%                                       | 19.5%            | <b>&lt; 0.0001</b> | 38.1%                                       | 21.5%                              | <b>&lt; 0.0001</b> | 59.5%                                       | 21.0%                                     | <b>&lt; 0.0001</b> |
| Have you used AI as a diagnostic aid in real life within pathology?                                                       | 160 (22.3%)                 | 31.8%                                       | 15.7%            | <b>&lt; 0.0001</b> | -                                           | -                                  | -                  | 81.0%                                       | 15.0%                                     | <b>&lt; 0.0001</b> |
| Have you used AI as a diagnostic aid in real life within dermatopathology?                                                | 79 (11.0%)                  | 18.9%                                       | 5.7%             | <b>&lt; 0.0001</b> | 40.0%                                       | 2.7%                               | <b>&lt; 0.0001</b> | -                                           | -                                         | -                  |
|                                                                                                                           | Good or excellent knowledge | Proportion with Good or excellent knowledge |                  |                    | Proportion with Good or excellent knowledge |                                    |                    | Proportion with Good or excellent knowledge |                                           |                    |
|                                                                                                                           |                             | Access to WSI                               | No access to WSI | P-value            | Previous use of AI in pathology             | No previous use of AI in pathology | P-value            | Previous use of AI in dermatopathology      | No previous use of AI in dermatopathology | P-value            |
| Which degree of knowledge would you say you have when it comes to AI within pathology?                                    | 135 (18.8%)                 | 28.2%                                       | 12.1%            | <b>&lt; 0.0001</b> | 31.3%                                       | 15.2%                              | <b>&lt; 0.0001</b> | 45.6%                                       | 15.5%                                     | <b>&lt; 0.0001</b> |

Abbreviations: AI, artificial intelligence; WSI, whole slide imaging.

Supplementary Table 2

| Question                                                                                                  | Agree or strongly agree | Proportion that agree or strongly agree to the question |                  |         | Proportion that agree or strongly agree to the question |                                    |               | Proportion that agree or strongly agree to the question |                                           |                    |
|-----------------------------------------------------------------------------------------------------------|-------------------------|---------------------------------------------------------|------------------|---------|---------------------------------------------------------|------------------------------------|---------------|---------------------------------------------------------|-------------------------------------------|--------------------|
|                                                                                                           |                         | Access to WSI                                           | No access to WSI | P-value | Previous use of AI in pathology                         | No previous use of AI in pathology | P-value       | Previous use of AI in dermatopathology                  | No previous use of AI in dermatopathology | P-value            |
| AI will revolutionize Medicine in general.                                                                | 534 (74.4%)             | 76.3%                                                   | 75.5%            | 0.86    | 81.0%                                                   | 74.3%                              | 0.092         | 81.6%                                                   | 75.1%                                     | 0.26               |
| AI will revolutionize dermatopathology.                                                                   | 435 (60.6%)             | 59.3%                                                   | 64.4%            | 0.20    | 67.7%                                                   | 61.0%                              | 0.13          | 74.7%                                                   | 61.0%                                     | <b>0.023</b>       |
| AI will revolutionize dermatopathology more than other subfields within pathology.                        | 133 (18.5%)             | 20.0%                                                   | 19.2%            | 0.84    | 23.7%                                                   | 18.5%                              | 0.17          | 42.7%                                                   | 16.8%                                     | <b>&lt; 0.0001</b> |
| In the foreseeable future all physicians will be replaced by AI.                                          | 43 (6.0%)               | 7.2%                                                    | 5.1%             | 0.25    | 12.9%                                                   | 4.2%                               | <b>0.0002</b> | 27.0%                                                   | 3.6%                                      | <b>&lt; 0.0001</b> |
| The human pathologist will be replaced by AI in the foreseeable future.                                   | 44 (6.1%)               | 6.2%                                                    | 6.7%             | 0.87    | 11.0%                                                   | 5.0%                               | <b>0.013</b>  | 23.0%                                                   | 4.3%                                      | <b>&lt; 0.0001</b> |
| A development with an increased use of AI in dermatopathology frightens me.                               | 116 (16.2%)             | 14.6%                                                   | 17.6%            | 0.35    | 16.3%                                                   | 16.1%                              | 1             | 21.5%                                                   | 15.5%                                     | 0.19               |
| A development with an increased use of AI in dermatopathology makes dermatopathology more exciting to me. | 427 (59.5%)             | 57.1%                                                   | 61.0%            | 0.31    | 64.4%                                                   | 58.1%                              | 0.17          | 69.6%                                                   | 58.2%                                     | 0.053              |
| A development with an increased use of AI makes medicine in general more exciting to me.                  | 464 (64.6%)             | 62.9%                                                   | 65.8%            | 0.47    | 66.3%                                                   | 64.2%                              | 0.64          | 75.9%                                                   | 63.2%                                     | <b>0.025</b>       |
| AI will improve dermatopathology                                                                          | 519 (72.3%)             | 75.6%                                                   | 75.8%            | 1       | 77.9%                                                   | 74.9%                              | 0.52          | 86.3%                                                   | 74.3%                                     | <b>0.022</b>       |

## Attitudes Towards AI Within Dermatopathology

|                                                                                           |                |       |       |               |       |       |      |       |       |      |
|-------------------------------------------------------------------------------------------|----------------|-------|-------|---------------|-------|-------|------|-------|-------|------|
| AI will improve medicine in general.                                                      | 580<br>(80.8%) | 84.1% | 83.2% | 0.83          | 83.0% | 83.4% | 0.90 | 85.3% | 83.1% | 0.74 |
| AI should be part of medical training.                                                    | 604<br>(84.1%) | 84.4% | 87.8% | 0.21          | 87.8% | 85.7% | 0.60 | 90.9% | 85.6% | 0.23 |
| I consider myself well-informed about the use of modern technology, especially computers. | 534<br>(74.4%) | 81.8% | 68.9% | <b>0.0001</b> | 79.4% | 72.9% | 0.12 | 79.7% | 73.7% | 0.28 |

Abbreviations: AI, artificial intelligence; WSI, whole slide imaging
